# Supplementary material for: Risk Factors Associated With Ischemic Stroke in Japanese Patients With Nonvalvular Atrial Fibrillation
Source: PubMed Central journal article supplement (PMC7160687; doi:10.1001/jamanetworkopen.2020.2881), 2020-04-15
Supplement: jamanetwopen-3-e202881-s001.pdf [file jamanetwopen-3-e202881-s001.pdf]

## Supplementary Online Content

Okumura K, Tomita H, Nakai M, et al. Risk factors associated with ischemic stroke in Japanese patients with nonvalvular atrial fibrillation. *JAMA Netw Open*. 2020;3(4):e202881. 10.1001/jamanetworkopen.2020.2881

**eTable 1.** Detailed Missing Data in the Study Patients

**eTable 2.** Patient Registration Period and Definition of Risk Factors in Each Registry

**eTable 3.** Competing Risk Regression Model Analysis

**eReferences.**

This supplementary material has been provided by the authors to give readers additional information about their work.

**eTable 1.** Detailed missing data in the study patients

|                               | Number of missing data |
|-------------------------------|------------------------|
| Body mass index               | 1,824                  |
| Chronic heart failure         | 10                     |
| Hypertension                  | 18                     |
| Diabetes                      | 1                      |
| Type of atrial fibrillation   | 23                     |
| Creatinine                    | 1,695                  |
| Hemoglobin                    | 1,718                  |
| Event record during follow-up | 81                     |
| Follow-up period              | 195                    |
| Oral anticoagulants           | 42                     |

**eTable 2.** Patient registration period and definition of risk factors in each registry

| Registry (reference)         | J-RHYTHM Registry (1-3)                                                                                                                                             | Fushimi AF Registry (4)                                                                                                                                                                        | Shinken Database (5)                                                                                            | Keio interhospital Cardiovascular Studies (6)                                                                                                                                               | Hokuriku-Plus AF Registry (7)                                                                                                                                                               |
|------------------------------|---------------------------------------------------------------------------------------------------------------------------------------------------------------------|------------------------------------------------------------------------------------------------------------------------------------------------------------------------------------------------|-----------------------------------------------------------------------------------------------------------------|---------------------------------------------------------------------------------------------------------------------------------------------------------------------------------------------|---------------------------------------------------------------------------------------------------------------------------------------------------------------------------------------------|
| Patient registration         | From January, 2009 to July, 2009                                                                                                                                    | From February, 2011 ~ ongoing                                                                                                                                                                  | From June, 2004 ~ ongoing                                                                                       | From January, 2012 to March, 2018                                                                                                                                                           | From May, 2013 to May, 2014                                                                                                                                                                 |
| “C” Congestive heart failure | <ul style="list-style-type: none"> <li>Recent heart failure based on the criteria of CHADS<sub>2</sub> score</li> <li>Clinically diagnosed heart failure</li> </ul> | <ul style="list-style-type: none"> <li>History of hospitalization for heart failure</li> <li>Symptoms of heart failure (NYHA≥2)</li> <li>Left ventricular ejection fraction &lt;40%</li> </ul> | <ul style="list-style-type: none"> <li>Symptoms of heart failure (NYHA≥2)</li> </ul>                            | <ul style="list-style-type: none"> <li>History of hospitalization for heart failure</li> <li>Symptoms of heart failure</li> </ul>                                                           | <ul style="list-style-type: none"> <li>History of hospitalization for heart failure</li> <li>Symptoms of heart failure</li> <li>Treatment for heart failure</li> </ul>                      |
| “H” Hypertension             | <ul style="list-style-type: none"> <li>Blood pressure ≥140/90 mmHg</li> <li>Antihypertensive drug</li> <li>History of hypertension</li> </ul>                       | <ul style="list-style-type: none"> <li>Blood pressure &gt;140/90 mmHg</li> <li>Antihypertensive drug</li> </ul>                                                                                | <ul style="list-style-type: none"> <li>Blood pressure &gt;140/90 mmHg</li> <li>Antihypertensive drug</li> </ul> | <ul style="list-style-type: none"> <li>Blood pressure ≥140/90 mmHg</li> <li>Antihypertensive drug</li> <li>History of hypertension</li> </ul>                                               | <ul style="list-style-type: none"> <li>Blood pressure &gt;140/90 mmHg</li> <li>Antihypertensive drug</li> </ul>                                                                             |
| “D” Diabetes                 | <ul style="list-style-type: none"> <li>HbA1c ≥6.5%</li> <li>Treatment for diabetes</li> </ul>                                                                       | <ul style="list-style-type: none"> <li>HbA1c &gt;6.5%</li> <li>Treatment for diabetes</li> </ul>                                                                                               | <ul style="list-style-type: none"> <li>HbA1c &gt;6.5%</li> <li>Treatment for diabetes</li> </ul>                | <ul style="list-style-type: none"> <li>HbA1c &gt;6.5%</li> <li>Fasting plasma glucose &gt;126 mg/dL</li> <li>Random plasma glucose &gt;200 mg/dL</li> <li>Treatment for diabetes</li> </ul> | <ul style="list-style-type: none"> <li>HbA1c &gt;6.5%</li> <li>Fasting plasma glucose &gt;126 mg/dL</li> <li>Random plasma glucose &gt;200 mg/dL</li> <li>Treatment for diabetes</li> </ul> |
| “V” Vascular diseases        | <ul style="list-style-type: none"> <li>Coronary artery disease</li> </ul>                                                                                           | <ul style="list-style-type: none"> <li>Myocardial infarction</li> <li>Peripheral artery disease</li> </ul>                                                                                     | <ul style="list-style-type: none"> <li>Myocardial infarction</li> <li>Peripheral artery disease</li> </ul>      | <ul style="list-style-type: none"> <li>Coronary artery disease</li> <li>Peripheral artery disease</li> <li>Large vessel disease</li> </ul>                                                  | <ul style="list-style-type: none"> <li>Coronary artery disease</li> <li>Peripheral artery disease</li> <li>Large vessel disease</li> </ul>                                                  |

NYHA indicates New York Heart Association Functional Classification, HbA1c; Hemoglobin A1c.

**eTable 3.** Competing risk regression model analysis

|                                      | Univariate       |         | Multivariable    |         | Stepwise         |         |
|--------------------------------------|------------------|---------|------------------|---------|------------------|---------|
|                                      | SHR (95%CI)      | p-value | SHR (95%CI)      | p-value | SHR (95%CI)      | p-value |
| Age (<75 years)                      | Reference        |         | Reference        |         | Reference        |         |
| 75-84 years                          | 1.63 (1.26-2.11) | <0.001  | 1.60 (1.19-2.14) | 0.002   | 1.74 (1.31-2.31) | <0.001  |
| ≥85 years                            | 2.67 (1.89-3.78) | <0.001  | 2.04 (1.33-3.12) | 0.001   | 2.41 (1.59-3.64) | <0.001  |
| Female                               | 1.36 (1.05-1.76) | 0.02    | 1.20 (0.90-1.59) | 0.22    |                  |         |
| CHF                                  | 1.48 (1.14-1.93) | 0.004   | 1.08 (0.81-1.44) | 0.59    |                  |         |
| Hypertension                         | 1.63 (1.17-2.27) | 0.004   | 1.51 (1.07-2.13) | 0.02    | 1.60 (1.14-2.24) | 0.007   |
| Diabetes                             | 1.21 (0.90-1.62) | 0.21    | 1.09 (0.80-1.48) | 0.58    |                  |         |
| Previous stroke                      | 3.08 (2.36-4.04) | <0.001  | 2.72 (2.04-3.62) | <0.001  | 2.75 (2.07-3.65) | <0.001  |
| Vascular disease                     | 1.34 (0.96-1.87) | 0.09    | 1.03 (0.73-1.46) | 0.86    |                  |         |
| Type of AF<br>(persistent/permanent) | 1.61 (1.23-2.11) | <0.001  | 1.58 (1.18-2.11) | 0.002   | 1.59 (1.21-2.10) | 0.001   |
| Low BMI <18.5 kg/m <sup>2</sup>      | 1.95 (1.33-2.86) | 0.001   | 1.46 (0.98-2.19) | 0.07    | 1.54 (1.04-2.29) | 0.03    |
| Creatinine ≥1.0 mg/dL                | 1.47 (1.13-1.90) | 0.004   | 1.21 (0.92-1.60) | 0.17    |                  |         |
| Low hemoglobin                       | 1.72 (1.33-2.24) | <0.001  | 1.18 (0.88-1.58) | 0.28    |                  |         |
| No oral anticoagulant                | 1.49 (1.14-1.95) | 0.004   | 1.86 (1.38-2.51) | <0.001  | 1.86 (1.38-2.50) | <0.001  |

SHR indicates subhazard ratio, CI; confidence interval, CHF; congestive heart failure, AF; atrial fibrillation, BMI; body mass index.

## eReferences

1. Atarashi H, Inoue H, Okumura K, Yamashita T, Origasa H. Investigation of optimal anticoagulation strategy for stroke prevention in Japanese patients with atrial fibrillation-the J-RHYTHM Registry study design. *J Cardiol*. 2011;57(1):95-99.
2. Kodani E, Atarashi H, Inoue H, et al. Impact of blood pressure control on thromboembolism and major hemorrhage in patients with non-valvular atrial fibrillation: A subanalysis of the J-RHYTHM Registry. *J Am Heart Assoc*. 2016;5(9):e004075.
3. Okumura K, Inoue H, Atarashi H, Yamashita T, Tomita H, Origasa H. Validation of CHA<sub>2</sub>DS<sub>2</sub>-VASc and HAS-BLED scores in Japanese patients with nonvalvular atrial fibrillation: an analysis of the J-RHYTHM Registry. *Circ J*. 2014;78(7):1593-1599.
4. Akao M, Chun YH, Wada H, et al. Current status of clinical background of patients with atrial fibrillation in a community-based survey: the Fushimi AF Registry. *J Cardiol*. 2013;61(4):260-266.
5. Suzuki S, Otsuka T, Sagara K, et al. Nine-year trend of anticoagulation use, thromboembolic events, and major bleeding in patients with non-valvular atrial fibrillation- Shinken Database Analysis. *Circ J*. 2016;80(3):639-649.
6. Ikemura N, Kohsaka S, Kimura T, et al. Assessment of sex differences in the initial symptom burden, applied treatment strategy, and quality of life in Japanese patients with atrial fibrillation. *JAMA Netw Open*. 2019;2(3):e191145.
7. Hayashi K, Tsuda T, Nomura A, et al. Impact of B-type natriuretic peptide level on risk stratification of thromboembolism and death in patients with nonvalvular atrial fibrillation- The Hokuriku-Plus AF Registry. *Circ J*. 2018;82(5):1271-1278.
